# Supplementary material for: A Tumor-Infiltration CD8+ T Cell-Based Gene Signature for Facilitating the Prognosis and Estimation of Immunization Responses in HPV+ Head and Neck Squamous Cell Cancer
Source: Front Oncol. 2021 Sep 28;11:749398. doi: 10.3389/fonc.2021.749398 (PMC8507562; doi:10.3389/fonc.2021.749398)
Supplement: Supplementary file 4 [file Table_4.xlsx]

## Sheet: Sheet 1 - cd8degs for figure3a
CD8 DEGs for Figure3a
	p_val	avg_log2FC	pct.1	pct.2	p_val_adj
HLA-B	0	-0.434087007497845	999	1	0
CHI3L2	1.75804328275114e-283	1.25802886073496	269	68	3.83253435639749e-279
HLA-DQA2	4.38621990748153e-271	0.769291173117816	277	69	9.56195939830973e-267
RPS26	4.60850351306408e-264	0.440528368684628	991	884	1.00465376584797e-259
RPS4Y1	4.22456730212305e-262	0.595336256806371	0.79	443	9.20955671862824e-258
ITM2A	1.21963556785402e-236	0.843290406449445	722	482	2.65880553792177e-232
XIST	1.17366498734419e-176	-0.816589066289086	0	139	2.55858967241033e-172
GNLY	7.01469385648161e-164	-1.34030576998974	436	621	1.52920326071299e-159
HLA-DRB5	2.60141685691101e-161	0.678293492962462	587	363	5.67108874806600e-157
RGS1	4.02193347509932e-150	0.525671707242575	848	682	8.76781497571652e-146
FCER1G	1.8040888638834e-148	-1.16954453468949	55	211	3.93291372326582e-144
CD27	2.02861215579784e-132	0.700134355413503	631	451	4.42237449963929e-128
TYROBP	5.87206661236821e-128	-1.02553115011605	85	241	1.28011052149627e-123
CXCL8	1.10888124365735e-124	-0.787482102924817	81	0.23	2.41736111117301e-120
TXNIP	1.43297550582795e-122	0.427792873408177	674	0.47	3.12388660270493e-118
HLA-DPB1	4.87998104971405e-122	0.416817007705128	842	696	1.06383586883766e-117
LGALS1	1.09409075220444e-121	-0.890483266950066	446	603	2.38511783980568e-117
TSC22D3	3.55980067377456e-119	0.305229268957548	857	669	7.76036546882854e-115
IL32	8.62288645434607e-119	0.326252302083344	971	898	1.87978924704744e-114
CTLA4	2.61951474137228e-113	0.617893337152471	307	154	5.71054213619157e-109
NBEAL1	1.83811941536383e-111	-0.486158090611638	477	635	4.00710032549315e-107
IFI6	8.69557307152937e-109	-1.00154772274408	0.35	491	1.8956349295934e-104
TRAC	1.15329672929865e-108	0.354225722098367	959	861	2.51418686987106e-104
TMSB10	2.94896506193393e-107	-0.310310946389825	994	996	6.42874383501597e-103
CRTAM	2.70676638200283e-106	0.46632767276308	287	138	5.90075071276617e-102
IFITM2	6.81203704168862e-106	-0.56397374607475	0.67	0.76	1.48502407508812e-101
DDX5	4.4595999527296e-104	0.291833304021806	964	891	9.72192789695054e-100
PPP2R5C	4.20933845506584e-101	0.44316683388648	0.69	502	9.17635783204353e-97
CD8A	8.40393013318459e-100	0.389846847672602	785	627	1.83205676903424e-95
UCP2	2.60447313016242e-98	0.480574358642441	533	356	5.67775142375408e-94
LCK	7.26026346705297e-92	0.343680539156727	815	656	1.58273743581755e-87
S100A8	7.65380717276186e-92	-0.612950649027909	61	176	1.66852996366208e-87
SEPT9	9.60037473928098e-92	0.413100480788277	548	367	2.09288169316325e-87
EVL	5.32336213713066e-90	0.322580745490558	909	825	1.16049294589448e-85
ITGAE	3.18898933286364e-87	0.409712150394685	503	331	6.95199674564274e-83
DTHD1	2.4254884379677e-86	0.424018603739924	151	56	5.28756479476958e-82
S100A11	4.76038257735053e-85	-0.508572582755619	553	649	1.03776340186242e-80
FTH1	3.25924137577521e-84	-0.311420599296386	974	976	7.10514619918995e-80
PLEK	6.96346684298428e-83	0.426214628440938	196	88	1.51803577177057e-78
FTL	2.64827093429373e-81	-0.309358043919304	872	909	5.77323063676032e-77
CHN1	1.0400428578141e-80	0.374414449573245	138	51	2.26729343003474e-76
COTL1	1.54824448182832e-79	0.36789030844364	863	762	3.37517297038574e-75
TOX	4.99163715234121e-78	0.420334933088675	219	108	1.08817689921038e-73
IGKC	3.81595436817627e-77	-0.633215660217752	542	625	8.31878052262427e-73
IGHA1	1.12151398545125e-76	-1.06006330257529	229	356	2.44490048828372e-72
S100A9	2.37336805733312e-75	-0.553771669045358	72	177	5.17394236498621e-71
SIRPG	5.91487075121412e-75	0.371304770743514	382	233	1.28944182376468e-70
KLF6	6.00095249581833e-74	0.273403724863588	844	0.69	1.3082076440884e-69
CCNH	1.28152803096253e-73	0.401383422104276	335	199	2.79373110749832e-69
CCL4L2	8.13469821994876e-72	-1.24432071173853	306	0.43	1.77336421194883e-67
PRKCH	8.6826103367931e-72	0.388889129186468	0.46	306	1.8928090534209e-67
CD8B	1.29443359876013e-71	0.35473189607031	657	497	2.82186524529707e-67
GZMM	5.91736522901042e-71	0.376044463104384	528	363	1.28998561992427e-66
RP11-796E2.4	1.06951085874773e-70	0.377390509393571	202	98	2.33153367207004e-66
GZMB	1.35801801289229e-70	-0.546629595004356	0.64	757	2.9604792681052e-66
CD52	4.96301968025884e-69	-0.299895586420432	902	943	1.08193829029643e-64
GADD45B	6.6283480556014e-69	-0.60554630684382	0.18	297	1.44497987612111e-64
FABP5	1.61003003572915e-68	0.403061066692477	425	0.28	3.50986547788954e-64
CD3E	1.04769650770152e-67	0.265428170784523	869	736	2.28397838678932e-63
1	1.17620694750864e-67	0.350950948617218	456	304	2.56413114556884e-63
ITGB2	2.20112290176906e-67	0.347748495613958	636	0.48	4.79844792585655e-63
SH3BGRL3	2.74202825078806e-67	-0.312602821231979	963	961	5.97762158671798e-63
ITGB1	1.04244367880378e-66	-0.594787120288011	0.29	397	2.27252721979225e-62
RP11-386I14.4	1.11186782586638e-66	0.434494446273973	283	163	2.42387186038871e-62
IGLC3	1.55290586259667e-66	-0.717461792871624	115	223	3.38533478046075e-62
PLCG2	1.65675913638093e-66	-1.70072171099636	65	156	3.61173491731043e-62
TSPYL2	1.1692054017333e-65	0.410894622001971	275	157	2.5488677757786e-61
TRAT1	3.33527511072197e-65	0.389150242522654	405	264	7.27089974137389e-61
KLRD1	3.8149466284461e-65	-0.631163145741809	0.34	458	8.3165836500125e-61
PRF1	1.2136589809611e-64	-0.653385661869225	578	624	2.64577657849519e-60
IER2	3.98726150633226e-63	-0.504370163149289	488	583	8.69223008380432e-59
HSPA1B	6.1114993886277e-63	-0.913843346465347	64	156	1.33230686672084e-58
SH2D1A	2.83214588874267e-62	0.418892611887079	439	303	6.17407803745902e-58
NPM1	9.1234700687081e-62	0.251440343564078	879	765	1.98891647497837e-57
ANKRD28	1.39444643849337e-61	0.554501621168867	318	205	3.03989323591554e-57
RP11-596C23.2	2.52681961069923e-61	0.334620801450643	114	44	5.50846675132432e-57
PECAM1	3.36990476807739e-60	0.3192706002245	161	76	7.3463923944087e-56
LAT	9.13627644782652e-60	0.36639622644635	592	444	1.99170826562618e-55
RPL17	8.94784032669547e-59	-0.387800312927384	0.74	754	1.95062919121961e-54
RP6-91H8.3	1.12144445337146e-58	0.298649562023168	103	38	2.44474890834979e-54
EIF1AY	3.81289499481096e-58	0.257908982033814	0.24	0.13	8.3121110886879e-54
LYZ	1.33235728706894e-57	-0.459570572772034	76	164	2.90453888581029e-53
TNFSF13B	2.681509731281e-57	0.309946926480835	105	0.04	5.84569121419257e-53
RP11-138A9.1	2.638747052214e-56	0.351900912007956	302	187	5.75246857382651e-52
RNF187	5.87129395034223e-56	0.277084775206949	295	176	1.27994208117461e-51
CORO1B	3.54941306017905e-55	0.39845685978063	313	198	7.73772047119034e-51
RP11-51J9.5	6.05327102823953e-55	0.27713560069016	301	182	1.31961308415622e-50
JUN	7.99057643647942e-55	-0.440614075873895	761	815	1.74194566315251e-50
DENND2D	9.32234464151328e-55	0.401425678666742	367	248	2.03227113184989e-50
GZMK	8.91316219679511e-53	0.540710637376222	577	516	1.94306935890133e-48
EOMES	4.23389600914013e-52	0.315362262150113	204	111	9.22989329992549e-48
ID3	1.09845139375962e-51	-0.513533886260601	38	107	2.39462403839597e-47
DGKZ	1.47125349744481e-51	0.296088402436288	305	191	3.20733262442968e-47
PATL2	4.93193936298273e-51	0.34899298307624	151	75	1.07516278113023e-46
GPSM3	1.68755137761381e-49	0.280034057297874	635	495	3.67886200319812e-45
DUSP2	1.29119720398707e-48	0.299317568562072	579	439	2.81480990469181e-44
LRMP	3.36111135753955e-48	0.254845872153595	157	0.08	7.32722275943622e-44
HMHA1	3.75560292170016e-48	0.290452087889405	444	314	8.18721436930635e-44
RASAL3	4.45509088252174e-48	0.270261901037941	466	328	9.7120981238974e-44
ACAP1	1.17186274851545e-47	0.250749375365976	782	656	2.55466079176368e-43
JAKMIP1	8.0232288784771e-47	0.280076223490386	222	129	1.74906389550801e-42
RP5-1028K7.2	1.00740218361223e-46	0.315386703937326	137	67	2.19613676027466e-42
SPP1	5.01716683584167e-46	-0.528780318917659	37	101	1.09374237021348e-41
S100A4	6.01469739340991e-46	-0.286431922687015	785	862	1.31120403176336e-41
TYMP	2.86737204095743e-45	-0.4778632383334	432	505	6.25087104928721e-41
CD84	3.95502690790559e-45	0.260107252916415	234	0.14	8.62195865923419e-41
ZFAS1	5.85940915505962e-45	0.312094926580681	583	459	1.277351195803e-40
VOPP1	1.08646624981173e-44	0.275802199860738	303	196	2.36849642458957e-40
FYN	1.43255458918657e-44	0.269952071927327	583	447	3.12296900442671e-40
TRBC2	2.48150271975777e-44	0.304018973461851	821	727	5.40967592907193e-40
PKM	2.7755340324442e-44	0.303283745588286	649	518	6.05066419072835e-40
RNF167	3.6267652026353e-43	0.256897692991579	387	268	7.90634814174495e-39
EIF5A	5.16671561738061e-43	-0.499944435896525	292	369	1.12634400458897e-38
CITED2	7.37655316715849e-43	0.34673954031885	414	296	1.60808859044055e-38
BIN1	8.96933979406046e-43	0.270308529020378	479	349	1.95531607510518e-38
SASH3	1.40311550195802e-42	0.274508350200999	295	192	3.05879179426849e-38
CMC1	2.42954562850451e-42	0.421320894316594	355	252	5.29640947013983e-38
CD28	6.49242932478137e-42	0.259787095244461	121	59	1.41534959280234e-37
TNF	1.01593639846726e-41	-0.501271386877053	44	107	2.21474134865863e-37
TAGAP	1.59233404354436e-41	0.268649870590378	244	151	3.47128821492671e-37
M6PR	2.29131164478793e-41	0.276585753351604	307	203	4.99505938563769e-37
PMAIP1	2.02610638942831e-40	0.341253824777831	355	0.25	4.41691192895372e-36
PTGER4	2.69294207615812e-40	0.270100225024885	334	227	5.8706137260247e-36
JAML	2.93746939106784e-40	0.285138204117592	466	349	6.4036832725279e-36
TIMP1	1.09222945931433e-39	-0.404652376044083	134	215	2.38106022130525e-35
RP11-166O4.6	2.36677465711004e-39	-0.357027390065847	104	0.18	5.15956875249988e-35
CST3	4.19243339028246e-39	-0.373345279120901	57	121	9.13950479081576e-35
IFITM3	9.97293269243668e-39	-0.538351457856353	97	0.17	2.1740993269512e-34
CNN2	1.10364726426157e-38	0.282426779704747	409	299	2.40595103609021e-34
TNFRSF9	3.37754390213437e-38	0.302030696522866	0.2	0.12	7.36304570665293e-34
ISG20	5.11703935241523e-38	-0.479288625942265	0.62	655	1.11551457882652e-33
TNFRSF18	1.31481385247286e-36	-0.551443370816161	198	0.28	2.86629419839084e-32
ID2	1.07666721660585e-34	-0.330888390231792	727	774	2.34713453220074e-30
AC090498.1	2.15575020988338e-32	-0.327905207055665	731	727	4.69953545754578e-28
FOSB	3.18109727140202e-32	-0.487880948182789	319	385	6.93479205165641e-28
FXYD5	3.9872639300645e-32	-0.289390857438032	607	643	8.6922353675406e-28
KLRG1	3.52589277774379e-30	0.265371825891375	0.16	97	7.68644625548147e-26
CD7	3.61994195273502e-30	-0.319259517050358	782	784	7.89147345696234e-26
SAT1	6.27816658384799e-30	-0.339355609363029	564	603	1.36864031527886e-25
IL7R	2.35476147197219e-29	-0.446739970032372	154	226	5.13338000889937e-25
IRF1	4.29450316039967e-29	-0.403320767667412	389	442	9.36201688967127e-25
IGHG3	2.23986405432483e-28	-0.448424638168826	163	229	4.88290363842812e-24
CCL3	2.3775822739705e-28	-0.932885072920999	361	426	5.18312935725569e-24
ISG15	4.15815801208817e-28	-0.75686100526702	582	599	9.0647844663522e-24
XBP1	8.6413014174398e-28	-0.377388935086663	238	302	1.88380370900188e-23
IFIT1	2.90626900778052e-27	-0.409845681894635	0.08	136	6.33566643696152e-23
IFIT3	9.87601746967039e-27	-0.473041767012995	99	157	2.15297180838815e-22
TRDC	1.8409689868589e-26	-0.327310106602548	92	155	4.01331239135239e-22
LMO4	2.05224206106258e-26	-0.322306665504089	82	136	4.47388769311642e-22
LMNA	2.13065417232146e-26	-0.496614798210553	131	191	4.64482609566079e-22
CCL3L3	5.54451183270537e-26	-0.677805700982863	209	278	1.20870357952977e-21
C12orf75	4.12501750478141e-25	-0.36844112583466	315	372	8.99253816042348e-21
CKLF	1.08414222771198e-24	-0.299892850150393	684	688	2.36343005641211e-20
GZMA	1.27844432375779e-24	-0.424176712201462	876	889	2.78700862579199e-20
BST2	1.91702226042451e-24	-0.367266346292641	528	555	4.17910852772542e-20
LY6E	3.77231564961165e-24	-0.341055100287595	752	754	8.2236481161534e-20
HSPA1A	1.58203559677471e-23	-0.751963455965444	163	0.22	3.44883760096887e-19
NBL1	2.2186931672648e-22	0.264286073315696	204	142	4.83675110463726e-18
GLIPR2	8.06059229889248e-22	-0.340754431064214	261	317	1.75720912115856e-17
IFI44L	5.03200632585542e-21	-0.452356622022879	211	268	1.09697737903648e-16
TXN	1.15406651597101e-20	-0.283646341859793	434	468	2.5158650048168e-16
TRBC1	1.66637373536734e-20	0.31831850109912	0.66	594	3.63269474310081e-16
XCL1	1.85721275428249e-20	-0.621801425342228	117	169	4.04872380433583e-16
GCHFR	2.32630124543229e-19	-0.376274080541694	176	227	5.07133671504238e-15
HLA-DRA	2.94162328049299e-19	-0.276563629747304	696	719	6.41273875147471e-15
ENTPD1	3.10451781412936e-19	0.27778610906282	269	209	6.767848834802e-15
KLRC1	1.78902721831338e-17	-0.47534114537348	179	232	3.90007933592317e-13
IGLC2	4.14875825806882e-17	-0.411838557470492	269	319	9.04429300259002e-13
OAS1	1.08296215952188e-16	-0.421221750015718	172	215	2.3608575077577e-12
IGHG1	1.29115881286676e-16	-0.338762943265856	162	0.21	2.81472621204955e-12
HERC5	2.54187095282604e-16	-0.311227785930266	82	122	5.54127867716076e-12
MX1	2.65880688729397e-16	-0.454269400517204	303	341	5.79619901430086e-12
CTD-3252C9.4	7.32371831436415e-16	-0.25973619337359	77	117	1.59657059253138e-11
NT5C3A	1.1347159916369e-15	-0.423134673203155	179	222	2.47368086176845e-11
IRF7	4.33349515385869e-15	-0.38683124510827	258	295	9.44701943541195e-11
JCHAIN	1.70257204535808e-14	-0.422860215848846	69	103	3.71160705888062e-10
TNFSF10	5.37528145118417e-14	-0.364551457160912	231	267	1.17181135635815e-09
GLUL	5.48758030354147e-14	-0.263110904868018	156	198	1.19629250617204e-09
DDX3X	1.0956387621946e-13	-0.292557439907183	331	364	2.38849250158424e-09
CSF1	2.7258231407885e-13	-0.316137235622348	122	161	5.94229444691894e-09
TMEM123	6.8920960356807e-13	-0.275322382628155	0.26	298	1.50247693577839e-08
RGCC	1.14888917318958e-12	-0.355939538291277	282	314	2.50457839755327e-08
BHLHE40	1.2633626138877e-12	-0.284954963609636	0.17	208	2.75413049827518e-08
MX2	1.44062524788302e-12	-0.287729820976745	105	142	3.14056304038499e-08
FAM118A	4.72649951198548e-12	-0.262915163516486	109	145	1.03037689361284e-07
LTB	5.1397822727889e-12	0.286874076124032	393	0.33	1.12047253546798e-07
SLC2A3	9.44082764489373e-12	-0.277959715374126	287	321	2.05810042658683e-07
HLA-DRB1	2.25396150069554e-11	-0.265851722423411	787	771	4.91363607151627e-07
TNFRSF4	5.99949152215505e-11	-0.288612404911403	83	113	1.3078891518298e-06
PHLDA1	1.4543989606185e-10	-0.339109163513104	168	201	3.17058973414833e-06
CARD19	6.48061876470575e-10	-0.266629929343062	193	221	1.41277489070585e-05
IFITM1	7.50494582590551e-10	-0.412768669698519	554	538	1.6360781900474e-05
CD247	1.04004582593320e-09	-0.26697528363013	473	478	2.26729990053437e-05
BIRC3	1.1898418011344e-09	-0.262459732447336	223	256	2.593855126473e-05
ZC3HAV1	1.44517344364379e-09	-0.251737361364194	222	251	3.15047810714347e-05
RSAD2	4.11285821543022e-09	-0.261823434013526	81	108	8.96603090963789e-05
GALNT2	1.43810426125053e-08	-0.272194667558601	164	193	0.000313506728952616
SLC38A2	1.17900533750464e-07	-0.2525767762465	224	248	0.00257023163576012
PPP1R14B	1.50523488156582e-07	-0.34176194806933	185	209	0.00328141204181348
EPSTI1	3.75044754107017e-07	-0.268870987834486	211	234	0.00817597563953298
GPR183	6.16884620313954e-07	-0.27447642298392	242	266	0.0134480847228442
ACP5	5.98239513918788e-06	-0.295320879026232	304	315	0.130416214034296
DNAJB1	0.000175368188083145	-0.31249970338366	295	302	1
CCL4	0.0302837069847971	-0.530099955983556	825	762	1
IFNG	0.479967126453637	-0.486347467563969	467	435	1
